# Supplementary material for: An Industrial Control System for Cement Sulfates Content Using a Feedforward and Feedback Mechanism
Source: MDPI journal article supplement (doi:10.3390/chemengineering8020033), 2024-03-07
Supplement: s1 [file s1]

## SUPPLEMENTARY MATERIAL

Table S1 provides all the raw data for the calculation of correlation coefficients according to the model described in Subsection 3.2.

**Table S1.** Data for the calculation of correlation coefficients

| SR Controller             |       |          |        |        |       |          |             |              |            |             |             |              |             |
|---------------------------|-------|----------|--------|--------|-------|----------|-------------|--------------|------------|-------------|-------------|--------------|-------------|
| CM6 CEM II B-M (P-L) 32.5 |       |          |        |        |       |          |             |              |            |             |             |              |             |
| Year                      | CL    | $u_{CL}$ | G      | $u_G$  | FA    | $u_{FA}$ | $SO_{3,CL}$ | $u_{SO3,CL}$ | $SO_{3,G}$ | $u_{SO3,G}$ | $SO_{3,FA}$ | $u_{SO3,FA}$ | $u_{s,CEM}$ |
| 2005                      | 0.638 | 0.0150   | 0.0420 | 0.0050 |       |          | 1.31        | 0.33         | 41.79      | 1.63        |             |              | 0.19        |
| 2006                      | 0.641 | 0.0142   | 0.0410 | 0.0040 |       |          | 1.31        | 0.28         | 41.65      | 2.64        |             |              | 0.17        |
| 2007                      | 0.636 | 0.0140   | 0.0400 | 0.0035 |       |          | 1.42        | 0.34         | 42.38      | 1.79        |             |              | 0.15        |
| 2008                      | 0.650 | 0.0146   | 0.0400 | 0.0036 |       |          | 1.4         | 0.38         | 41.77      | 4.12        |             |              | 0.15        |
| 2009                      | 0.651 | 0.0180   | 0.0430 | 0.0034 |       |          | 1.43        | 0.3          | 40.47      | 2.46        |             |              | 0.14        |
| 2010                      | 0.656 | 0.0187   | 0.0420 | 0.0030 |       |          | 1.14        | 0.27         | 40.64      | 2.42        |             |              | 0.12        |
| 2011                      | 0.638 | 0.0170   | 0.0420 | 0.0031 |       |          | 1.28        | 0.36         | 42.30      | 2.62        |             |              | 0.12        |
| 2012                      | 0.626 | 0.0139   | 0.0420 | 0.0033 |       |          | 1.24        | 0.26         | 42.01      | 0.86        |             |              | 0.13        |
| CM6 CEM II A-L 42.5       |       |          |        |        |       |          |             |              |            |             |             |              |             |
| 2005                      | 0.821 | 0.0163   | 0.0474 | 0.0040 |       |          | 1.31        | 0.33         | 41.79      | 1.63        |             |              | 0.15        |
| 2006                      | 0.816 | 0.0136   | 0.0464 | 0.0035 |       |          | 1.31        | 0.28         | 41.65      | 2.64        |             |              | 0.15        |
| 2007                      | 0.811 | 0.0167   | 0.0457 | 0.0034 |       |          | 1.42        | 0.34         | 41.38      | 1.79        |             |              | 0.14        |
| 2008                      | 0.802 | 0.0157   | 0.0432 | 0.0035 |       |          | 1.4         | 0.38         | 41.77      | 4.12        |             |              | 0.14        |
| 2009                      | 0.808 | 0.0178   | 0.0450 | 0.0030 |       |          | 1.43        | 0.3          | 40.47      | 2.46        |             |              | 0.12        |
| 2010                      | 0.808 | 0.0179   | 0.0456 | 0.0028 |       |          | 1.14        | 0.27         | 39.64      | 2.42        |             |              | 0.11        |
| 2011                      | 0.784 | 0.0277   | 0.0441 | 0.0025 |       |          | 1.28        | 0.36         | 42.30      | 2.62        |             |              | 0.10        |
| 2012                      | 0.772 | 0.0139   | 0.0490 | 0.0035 |       |          | 1.24        | 0.26         | 42.01      | 0.86        |             |              | 0.13        |
| CM5 CEM II B-M (P-L) 32.5 |       |          |        |        |       |          |             |              |            |             |             |              |             |
| 2005                      | 0.626 | 0.0093   | 0.0419 | 0.0038 |       |          | 1.31        | 0.33         | 41.79      | 1.63        |             |              | 0.16        |
| 2006                      | 0.636 | 0.0122   | 0.0402 | 0.0035 |       |          | 1.31        | 0.28         | 41.65      | 2.64        |             |              | 0.15        |
| 2007                      | 0.636 | 0.0125   | 0.0399 | 0.0036 |       |          | 1.42        | 0.34         | 42.38      | 1.79        |             |              | 0.15        |
| 2008                      | 0.644 | 0.0140   | 0.0399 | 0.0034 |       |          | 1.4         | 0.38         | 41.77      | 4.12        |             |              | 0.14        |
| 2009                      | 0.640 | 0.0147   | 0.0421 | 0.0033 |       |          | 1.43        | 0.3          | 40.47      | 2.46        |             |              | 0.13        |
| 2010                      | 0.640 | 0.0168   | 0.0419 | 0.0031 |       |          | 1.14        | 0.27         | 39.64      | 2.42        |             |              | 0.12        |
| 2011                      | 0.636 | 0.0177   | 0.0416 | 0.0033 |       |          | 1.28        | 0.36         | 42.30      | 2.62        |             |              | 0.13        |
| 2012                      | 0.634 | 0.0196   | 0.0400 | 0.0040 |       |          | 1.24        | 0.26         | 42.01      | 0.86        |             |              | 0.15        |
| CM5 CEM II A-L 42.5       |       |          |        |        |       |          |             |              |            |             |             |              |             |
| 2005                      | 0.796 | 0.0167   | 0.0451 | 0.0039 |       |          | 1.31        | 0.33         | 41.79      | 1.63        |             |              | 0.16        |
| 2006                      | 0.821 | 0.0156   | 0.0454 | 0.0032 |       |          | 1.31        | 0.28         | 41.65      | 2.64        |             |              | 0.13        |
| 2008                      | 0.815 | 0.0181   | 0.0440 | 0.0026 |       |          | 1.4         | 0.38         | 41.77      | 4.12        |             |              | 0.11        |
| 2009                      | 0.809 | 0.0199   | 0.0433 | 0.0030 |       |          | 1.43        | 0.3          | 40.47      | 2.46        |             |              | 0.12        |
| 2010                      | 0.800 | 0.0238   | 0.0448 | 0.0043 |       |          | 1.14        | 0.27         | 39.64      | 2.42        |             |              | 0.17        |
| 2011                      | 0.788 | 0.0293   | 0.0440 | 0.0029 |       |          | 1.28        | 0.36         | 42.30      | 2.62        |             |              | 0.12        |
| 2012                      | 0.774 | 0.0145   | 0.0445 | 0.0036 |       |          | 1.24        | 0.26         | 42.01      | 0.86        |             |              | 0.14        |
| CM5 CEM IV B (P-W) 32.5   |       |          |        |        |       |          |             |              |            |             |             |              |             |
| 2007                      | 0.536 | 0.0223   | 0.0310 | 0.0042 | 0.217 | 0.0303   | 1.42        | 0.34         | 42.38      | 1.79        | 2.25        | 0.62         | 0.190       |
| 2008                      | 0.551 | 0.0234   | 0.0248 | 0.0084 | 0.173 | 0.0377   | 1.4         | 0.38         | 41.77      | 4.12        | 1.82        | 0.67         | 0.250       |
| 2009                      | 0.563 | 0.0267   | 0.0295 | 0.0075 | 0.193 | 0.0523   | 1.43        | 0.3          | 40.47      | 2.46        | 1.31        | 0.72         | 0.290       |
| 2010                      | 0.565 | 0.0230   | 0.0324 | 0.0109 | 0.213 | 0.0315   | 1.14        | 0.27         | 39.64      | 2.42        | 1.24        | 0.60         | 0.270       |
| 2011                      | 0.544 | 0.0333   | 0.0393 | 0.0047 | 0.203 | 0.0218   | 1.28        | 0.36         | 42.30      | 2.62        | 1.11        | 0.77         | 0.190       |
| 2012                      | 0.500 | 0.0213   | 0.0379 | 0.0026 | 0.237 | 0.0264   | 1.24        | 0.26         | 42.01      | 0.86        | 1.64        | 0.60         | 0.190       |

| FF/FB Controller          |       |        |        |        |       |        |      |      |       |      |      |      |       |
|---------------------------|-------|--------|--------|--------|-------|--------|------|------|-------|------|------|------|-------|
| CM6 CEM II B-M (P-L) 32.5 |       |        |        |        |       |        |      |      |       |      |      |      |       |
| 2013                      | 0.640 | 0.0186 | 0.0410 | 0.0027 |       |        | 1.32 | 0.16 | 42.18 | 0.92 |      |      | 0.10  |
| 2014                      | 0.629 | 0.0121 | 0.0440 | 0.0030 |       |        | 1.24 | 0.17 | 42.02 | 1.37 |      |      | 0.09  |
| 2015                      | 0.628 | 0.0106 | 0.0470 | 0.0023 |       |        | 1.29 | 0.16 | 40.35 | 1.40 |      |      | 0.10  |
| 2016                      | 0.629 | 0.0094 | 0.0400 | 0.0033 |       |        | 1.51 | 0.21 | 39.01 | 3.13 |      |      | 0.07  |
| 2017                      | 0.677 | 0.0232 | 0.0400 | 0.0018 |       |        | 1.3  | 0.26 | 41.53 | 2.70 |      |      | 0.07  |
| 2018                      | 0.696 | 0.0127 | 0.0515 | 0.0016 |       |        | 1.03 | 0.31 | 42.21 | 4.33 |      |      | 0.06  |
| 2019                      | 0.700 | 0.0151 | 0.0515 | 0.0019 |       |        | 0.76 | 0.27 | 40.05 | 3.13 |      |      | 0.08  |
| 2020                      | 0.676 | 0.0094 | 0.0520 | 0.0020 |       |        | 0.8  | 0.22 | 42.49 | 2.09 |      |      | 0.08  |
| 2021                      | 0.676 | 0.0109 | 0.0503 | 0.0015 |       |        | 0.83 | 0.17 | 44.19 | 0.89 |      |      | 0.06  |
| 2022                      | 0.656 | 0.0119 | 0.0497 | 0.0015 |       |        | 0.89 | 0.18 | 44.92 | 1.25 |      |      | 0.06  |
| 2023                      | 0.646 | 0.0099 | 0.0373 | 0.0022 |       |        | 1.08 | 0.24 | 44.92 | 1.25 |      |      | 0.07  |
| CM6 CEM II A-L 42.5       |       |        |        |        |       |        |      |      |       |      |      |      |       |
| 2013                      | 0.802 | 0.0173 | 0.0500 | 0.0028 |       |        | 1.32 | 0.16 | 41.18 | 0.92 |      |      | 0.08  |
| 2014                      | 0.779 | 0.0175 | 0.0500 | 0.0028 |       |        | 1.24 | 0.17 | 42.02 | 1.37 |      |      | 0.08  |
| 2015                      | 0.774 | 0.0095 | 0.0540 | 0.0020 |       |        | 1.29 | 0.16 | 40.35 | 1.40 |      |      | 0.08  |
| 2016                      | 0.791 | 0.0071 | 0.0470 | 0.0028 |       |        | 1.51 | 0.21 | 40.01 | 3.13 |      |      | 0.07  |
| 2017                      | 0.789 | 0.0157 | 0.0572 | 0.0014 |       |        | 1.3  | 0.26 | 40.53 | 2.70 |      |      | 0.06  |
| 2018                      | 0.819 | 0.0155 | 0.0567 | 0.0011 |       |        | 1.03 | 0.31 | 41.21 | 4.33 |      |      | 0.04  |
| 2019                      | 0.812 | 0.0189 | 0.0568 | 0.0019 |       |        | 0.76 | 0.27 | 41.05 | 3.13 |      |      | 0.08  |
| 2020                      | 0.796 | 0.0120 | 0.0573 | 0.0014 |       |        | 0.8  | 0.22 | 42.49 | 2.09 |      |      | 0.06  |
| 2021                      | 0.786 | 0.0125 | 0.0561 | 0.0028 |       |        | 0.83 | 0.17 | 44.19 | 0.89 |      |      | 0.06  |
| 2022                      | 0.773 | 0.0085 | 0.0546 | 0.0022 |       |        | 0.89 | 0.18 | 43.92 | 1.25 |      |      | 0.09  |
| 2023                      | 0.775 | 0.0089 | 0.0404 | 0.0028 |       |        | 1.08 | 0.24 | 43.92 | 1.25 |      |      | 0.07  |
| CM5 CEM II B-M (P-L) 32.5 |       |        |        |        |       |        |      |      |       |      |      |      |       |
| 2013                      | 0.653 | 0.0201 | 0.0409 | 0.0029 |       |        | 1.32 | 0.16 | 41.18 | 0.92 |      |      | 0.11  |
| 2014                      | 0.631 | 0.0167 | 0.0424 | 0.0026 |       |        | 1.24 | 0.17 | 42.02 | 1.37 |      |      | 0.08  |
| 2015                      | 0.626 | 0.0136 | 0.0464 | 0.0029 |       |        | 1.29 | 0.16 | 40.35 | 1.40 |      |      | 0.11  |
| 2016                      | 0.628 | 0.0098 | 0.0394 | 0.0018 |       |        | 1.51 | 0.21 | 40.01 | 3.13 |      |      | 0.07  |
| 2017                      | 0.664 | 0.0229 | 0.0392 | 0.0018 |       |        | 1.3  | 0.26 | 40.53 | 2.70 |      |      | 0.08  |
| 2018                      | 0.690 | 0.0170 | 0.0516 | 0.0018 |       |        | 1.03 | 0.31 | 41.21 | 4.33 |      |      | 0.07  |
| 2019                      | 0.693 | 0.0175 | 0.0520 | 0.0022 |       |        | 0.76 | 0.27 | 41.05 | 3.13 |      |      | 0.09  |
| 2020                      | 0.672 | 0.0152 | 0.0517 | 0.0018 |       |        | 0.8  | 0.22 | 42.49 | 2.09 |      |      | 0.07  |
| 2021                      | 0.675 | 0.0127 | 0.0506 | 0.0019 |       |        | 0.83 | 0.17 | 44.19 | 0.89 |      |      | 0.06  |
| 2022                      | 0.647 | 0.0158 | 0.0364 | 0.0017 |       |        | 1.08 | 0.24 | 43.92 | 1.25 |      |      | 0.05  |
| CM5 CEM II A-L 42.5       |       |        |        |        |       |        |      |      |       |      |      |      |       |
| 2019                      | 0.804 | 0.0162 | 0.0566 | 0.0019 |       |        | 0.76 | 0.27 | 41.05 | 3.13 |      |      | 0.08  |
| 2020                      | 0.779 | 0.0101 | 0.0574 | 0.0020 |       |        | 0.8  | 0.22 | 42.49 | 2.09 |      |      | 0.08  |
| 2022                      | 0.770 | 0.0108 | 0.0543 | 0.0021 |       |        | 0.89 | 0.18 | 44.92 | 1.25 |      |      | 0.09  |
| CM5 CEM IV B (P-W) 32.5   |       |        |        |        |       |        |      |      |       |      |      |      |       |
| 2013                      | 0.480 | 0.0253 | 0.0388 | 0.0027 | 0.215 | 0.0284 | 1.32 | 0.16 | 0.00  | 0.92 | 2.03 | 0.71 | 0.100 |
| 2014                      | 0.467 | 0.0143 | 0.0369 | 0.0020 | 0.222 | 0.0224 | 1.24 | 0.17 | -1.00 | 1.37 | 2.12 | 0.60 | 0.080 |
| 2015                      | 0.461 | 0.0196 | 0.0352 | 0.0023 | 0.234 | 0.0368 | 1.29 | 0.16 | -1.00 | 1.40 | 1.73 | 0.48 | 0.070 |
| 2016                      | 0.476 | 0.0281 | 0.0318 | 0.0026 | 0.219 | 0.0598 | 1.51 | 0.21 | -1.00 | 3.13 | 2.18 | 0.66 | 0.070 |
| 2017                      | 0.459 | 0.0194 | 0.0385 | 0.0031 | 0.234 | 0.0452 | 1.3  | 0.26 | 0.00  | 2.70 | 1.76 | 0.44 | 0.100 |
| 2018                      | 0.465 | 0.0221 | 0.0390 | 0.0031 | 0.216 | 0.0466 | 1.03 | 0.31 | -1.00 | 4.33 | 1.86 | 0.67 | 0.103 |
| 2019                      | 0.453 | 0.0297 | 0.0406 | 0.0039 | 0.204 | 0.0523 | 0.76 | 0.27 | -2.00 | 3.13 | 2.04 | 0.50 | 0.144 |
| 2020                      | 0.468 | 0.0245 | 0.0418 | 0.0028 | 0.164 | 0.0494 | 0.8  | 0.22 | -1.00 | 2.09 | 2.27 | 1.11 | 0.106 |

[illegible]
